# Supplementary material
Source: MDPI journal article supplement (https://www.mdpi.com/2071-1050/9/2/215)
Supplement: s1 [file s1]

Supplementary Materials: A Decision Support System for Plant Optimization in Urban Areas with Diversified Solar Radiation

Heyi Wei 1, Zhengdong Huang 2,3,* and Mu Lin 3

**Table S1.** Field test values of solar radiation.

| **No.** | **Test Time** | **Test Location** | **Test Values (µmoles/m2/s)** | **Conversion Values (W/m2)** | **Whether There Is Direct Solar Radiation?** |
| --- | --- | --- | --- | --- | --- |
| Test-p-1 | 10:05 | JinDi-MeiYin | 194 | 42.49 | × |
| Test-p-2 | 10:10 | JinDi-MeiYin | 986 | 215.93 | √ |
| Test-p-3 | 10:12 | JinDi-MeiYin | 143 | 31.32 | × |
| Test-p-4 | 10:15 | JinDi-MeiYin | 192 | 42.05 | × |
| Test-p-5 | 10:21 | JinDi-MeiYin | 1142 | 250.10 | √ |
| Test-p-6 | 10:25 | JinDi-MeiYin | 118 | 25.84 | × |
| Test-p-7 | 10:28 | JinDi-LaiYin | 1196 | 261.92 | √ |
| Test-p-8 | 10:38 | JinDi-LaiYin | 114 | 24.97 | × |
| Test-p-9 | 10:40 | JinDi-LaiYin | 112 | 24.53 | × |
| Test-p-10 | 10:43 | JinDi-LaiYin | 85 | 18.62 | × |
| Test-p-11 | 10:44 | JinDi-LaiYin | 178 | 38.98 | × |
| Test-p-12 | 10:46 | JinDi-LaiYin | 263 | 57.60 | × |
| Test-p-13 | 10:50 | DaHua-II | 265 | 58.04 | × |
| Test-p-14 | 10:52 | DaHua-II | 103 | 22.56 | × |
| Test-p-15 | 10:55 | DaHua-II | 103 | 22.56 | × |
| Test-p-16 | 10:59 | DaHua-II | 129 | 28.25 | × |
| Test-p-17 | 11:02 | DaHua-II | 112 | 24.53 | × |
| Test-p-18 | 11:05 | DaHua-II | 113 | 24.75 | × |
| Test-p-19 | 11:10 | DaHua-I | 863 | 189.00 | × |
| Test-p-20 | 11:13 | DaHua-I | 158 | 34.60 | × |
| Test-p-21 | 11:20 | DaHua-I | 183 | 40.08 | × |
| Test-p-22 | 11:24 | DaHua-I | 126 | 27.59 | × |
| Test-p-23 | 11:25 | DaHua-I | 506 | 110.81 | × |
| Test-p-24 | 11:30 | DaHua-I | 120 | 26.28 | × |
| Test-p-25 | 11:55 | YaYuan | 1726 | 377.99 | √ |
| Test-p-26 | 11:58 | YaYuan | 1616 | 353.90 | √ |
| Test-p-27 | 12:13 | YaYuan | 863 | 189.00 | × |
| Test-p-28 | 12:15 | YaYuan | 752 | 164.69 | × |
| Test-p-29 | 12:20 | YaYuan | 1842 | 403.40 | √ |
| Test-p-30 | 12:27 | YaYuan | 1758 | 385.00 | √ |

Note: Test date is 4 February 2015.

**Table 2.** The simulation values of solar radiation for test locations based on the Solar Analyst.

| **No.** | **Time Settings** | **Total Radiation (W/m2)** | **Direct Radiation (W/m2)** | **Diffuse Radiation (W/m2)** | **Duration (Hours)** |
| --- | --- | --- | --- | --- | --- |
| Test-p-1 | 10:00 to 11:00 | 47.04 | 0.00 | 47.04 | 0.0 |
| Test-p-2 | 10:00 to 11:00 | 326.87 | 272.27 | 54.61 | 1.0 |
| Test-p-3 | 10:00 to 11:00 | 43.11 | 0.00 | 43.11 | 0.0 |
| Test-p-4 | 10:00 to 11:00 | 23.13 | 0.00 | 23.13 | 0.0 |
| Test-p-5 | 10:00 to 11:00 | 337.69 | 272.27 | 65.42 | 1.0 |
| Test-p-6 | 10:00 to 11:00 | 30.13 | 0.00 | 30.13 | 0.0 |
| Test-p-7 | 10:00 to 11:00 | 327.68 | 272.27 | 55.41 | 1.0 |
| Test-p-8 | 10:00 to 11:00 | 22.84 | 0.00 | 22.84 | 0.0 |
| Test-p-9 | 10:00 to 11:00 | 33.32 | 0.00 | 33.32 | 0.0 |
| Test-p-10 | 10:00 to 11:00 | 22.95 | 0.00 | 22.95 | 0.0 |
| Test-p-11 | 10:00 to 11:00 | 43.36 | 0.00 | 43.36 | 0.0 |
| Test-p-12 | 10:00 to 11:00 | 53.28 | 15.66 | 37.62 | 0.1 |
| Test-p-13 | 10:00 to 11:00 | 60.31 | 0.00 | 60.31 | 0.0 |
| Test-p-14 | 10:00 to 11:00 | 18.29 | 0.00 | 18.29 | 0.0 |
| Test-p-15 | 10:00 to 11:00 | 24.84 | 0.00 | 24.84 | 0.0 |
| Test-p-16 | 10:00 to 11:00 | 32.62 | 0.00 | 32.62 | 0.0 |
| Test-p-17 | 11:00 to 12:00 | 22.32 | 0.00 | 22.32 | 0.0 |
| Test-p-18 | 11:00 to 12:00 | 29.04 | 0.00 | 29.04 | 0.0 |
| Test-p-19 | 11:00 to 12:00 | 232.84 | 159.39 | 73.45 | 0.5 |
| Test-p-20 | 11:00 to 12:00 | 41.24 | 0.00 | 41.24 | 0.0 |
| Test-p-21 | 11:00 to 12:00 | 42.26 | 0.00 | 42.26 | 0.0 |
| Test-p-22 | 11:00 to 12:00 | 23.30 | 0.00 | 23.30 | 0.0 |
| Test-p-23 | 11:00 to 12:00 | 154.60 | 96.90 | 57.69 | 0.3 |
| Test-p-24 | 11:00 to 12:00 | 24.07 | 0.00 | 24.07 | 0.0 |
| Test-p-25 | 11:00 to 12:00 | 399.97 | 325.74 | 74.23 | 1.0 |
| Test-p-26 | 11:00 to 12:00 | 397.67 | 325.74 | 71.93 | 1.0 |
| Test-p-27 | 12:00 to 13:00 | 232.86 | 216.45 | 16.41 | 0.5 |
| Test-p-28 | 12:00 to 13:00 | 208.38 | 194.37 | 14.01 | 0.5 |
| Test-p-29 | 12:00 to 13:00 | 534.86 | 440.65 | 94.21 | 1.0 |
| Test-p-30 | 12:00 to 13:00 | 516.50 | 440.65 | 75.85 | 1.0 |

Note: Modeling date is 4 February, 2015.

**Table S3.** Parameter settings for solar radiation model.

| **Names** | **Description** | **Names** | **Description** |
| --- | --- | --- | --- |
| Location | City of Wuhan | Building height | N × 3.3 m |
| Time period | 2014 | Building grid size | 0.5 × 0.5 |
| Latitude | 30.5°N | Time configuration | Special days/within a day/multiple days |
| Sky size | 200 × 200 | Day interval | 14 |
| Proportion of diffuse radiation | 0.4 | Hour interval | 0.1 h |
| Diffuse model type | Standard overcast sky | Calculation directions | 32 |
| Transmittivity | 0.4 | Azimuth divisions | 8 |
| Zenith divisions | 8 |  |  |


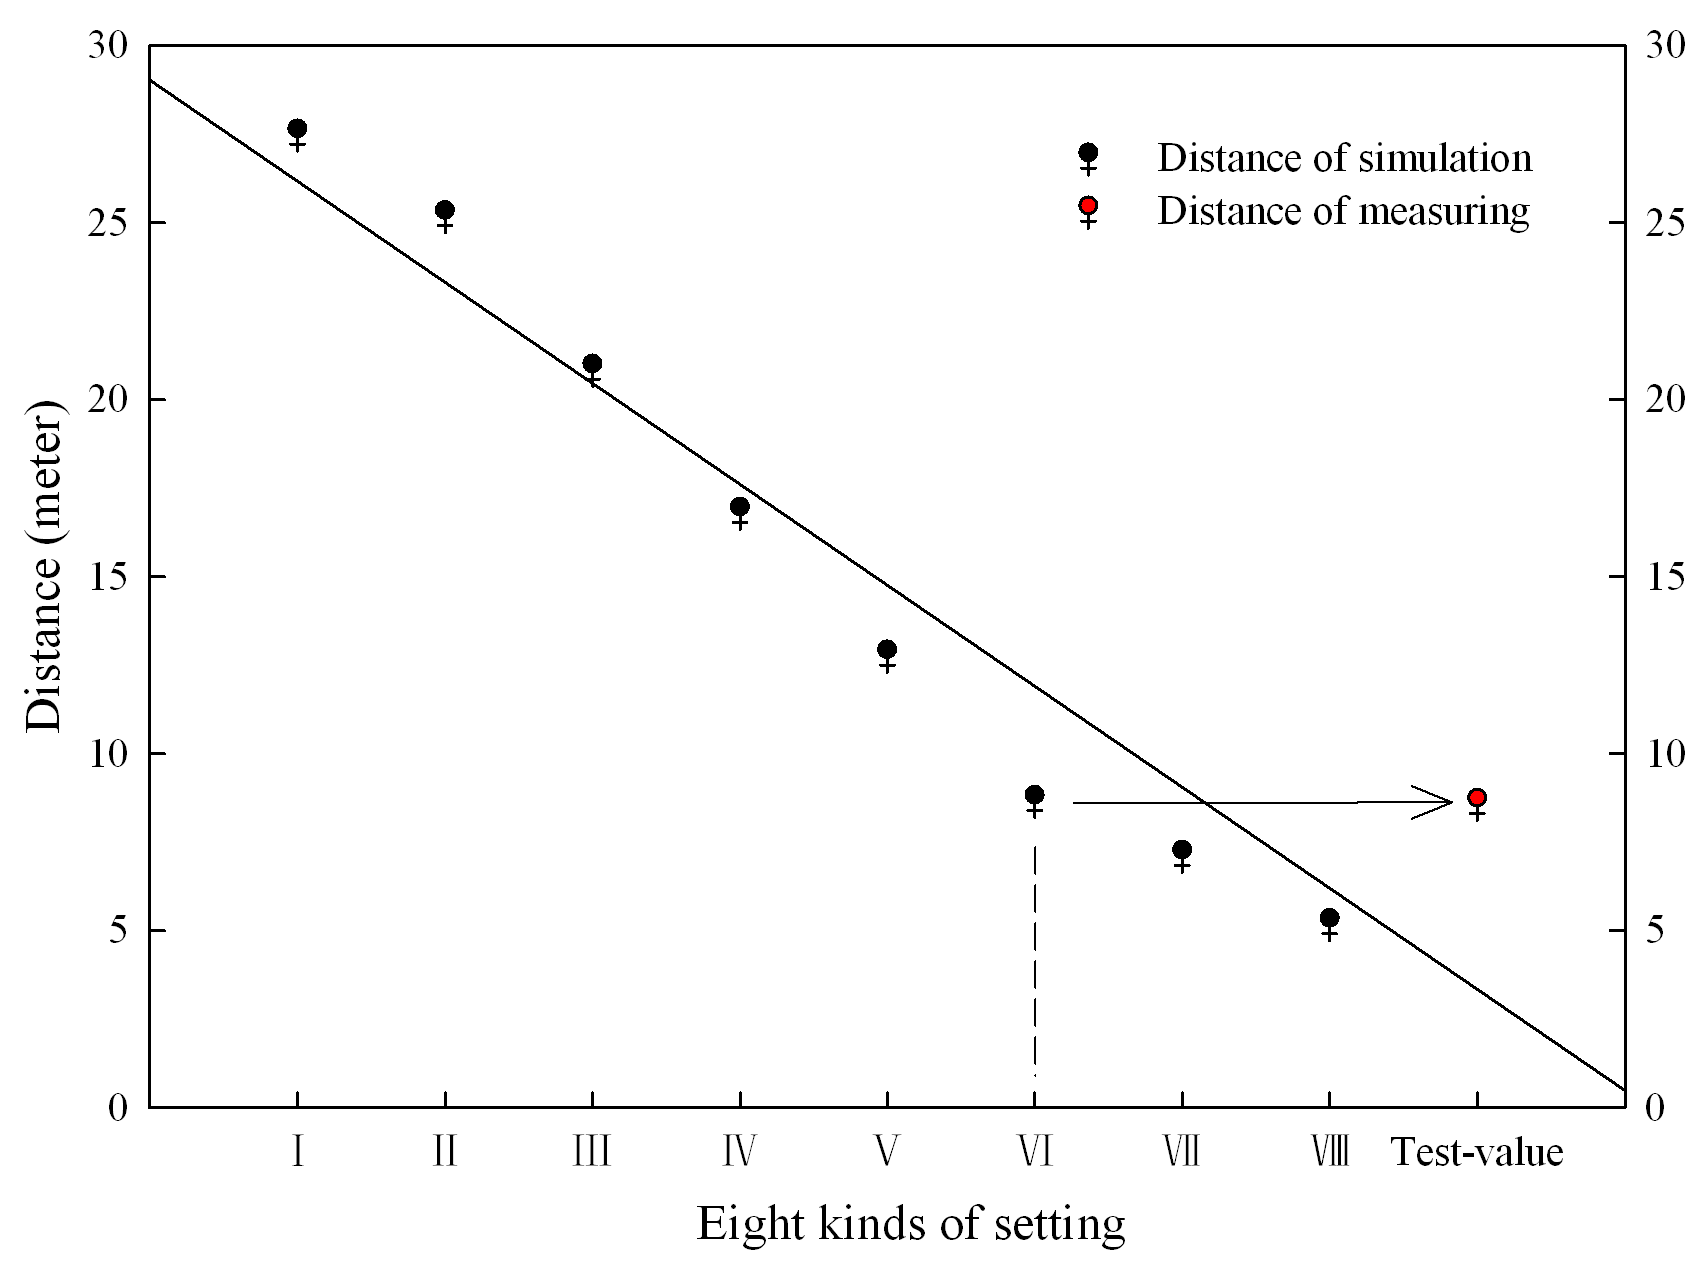


**Figure S1.** Comparison of shadow distance between testing and simulation.


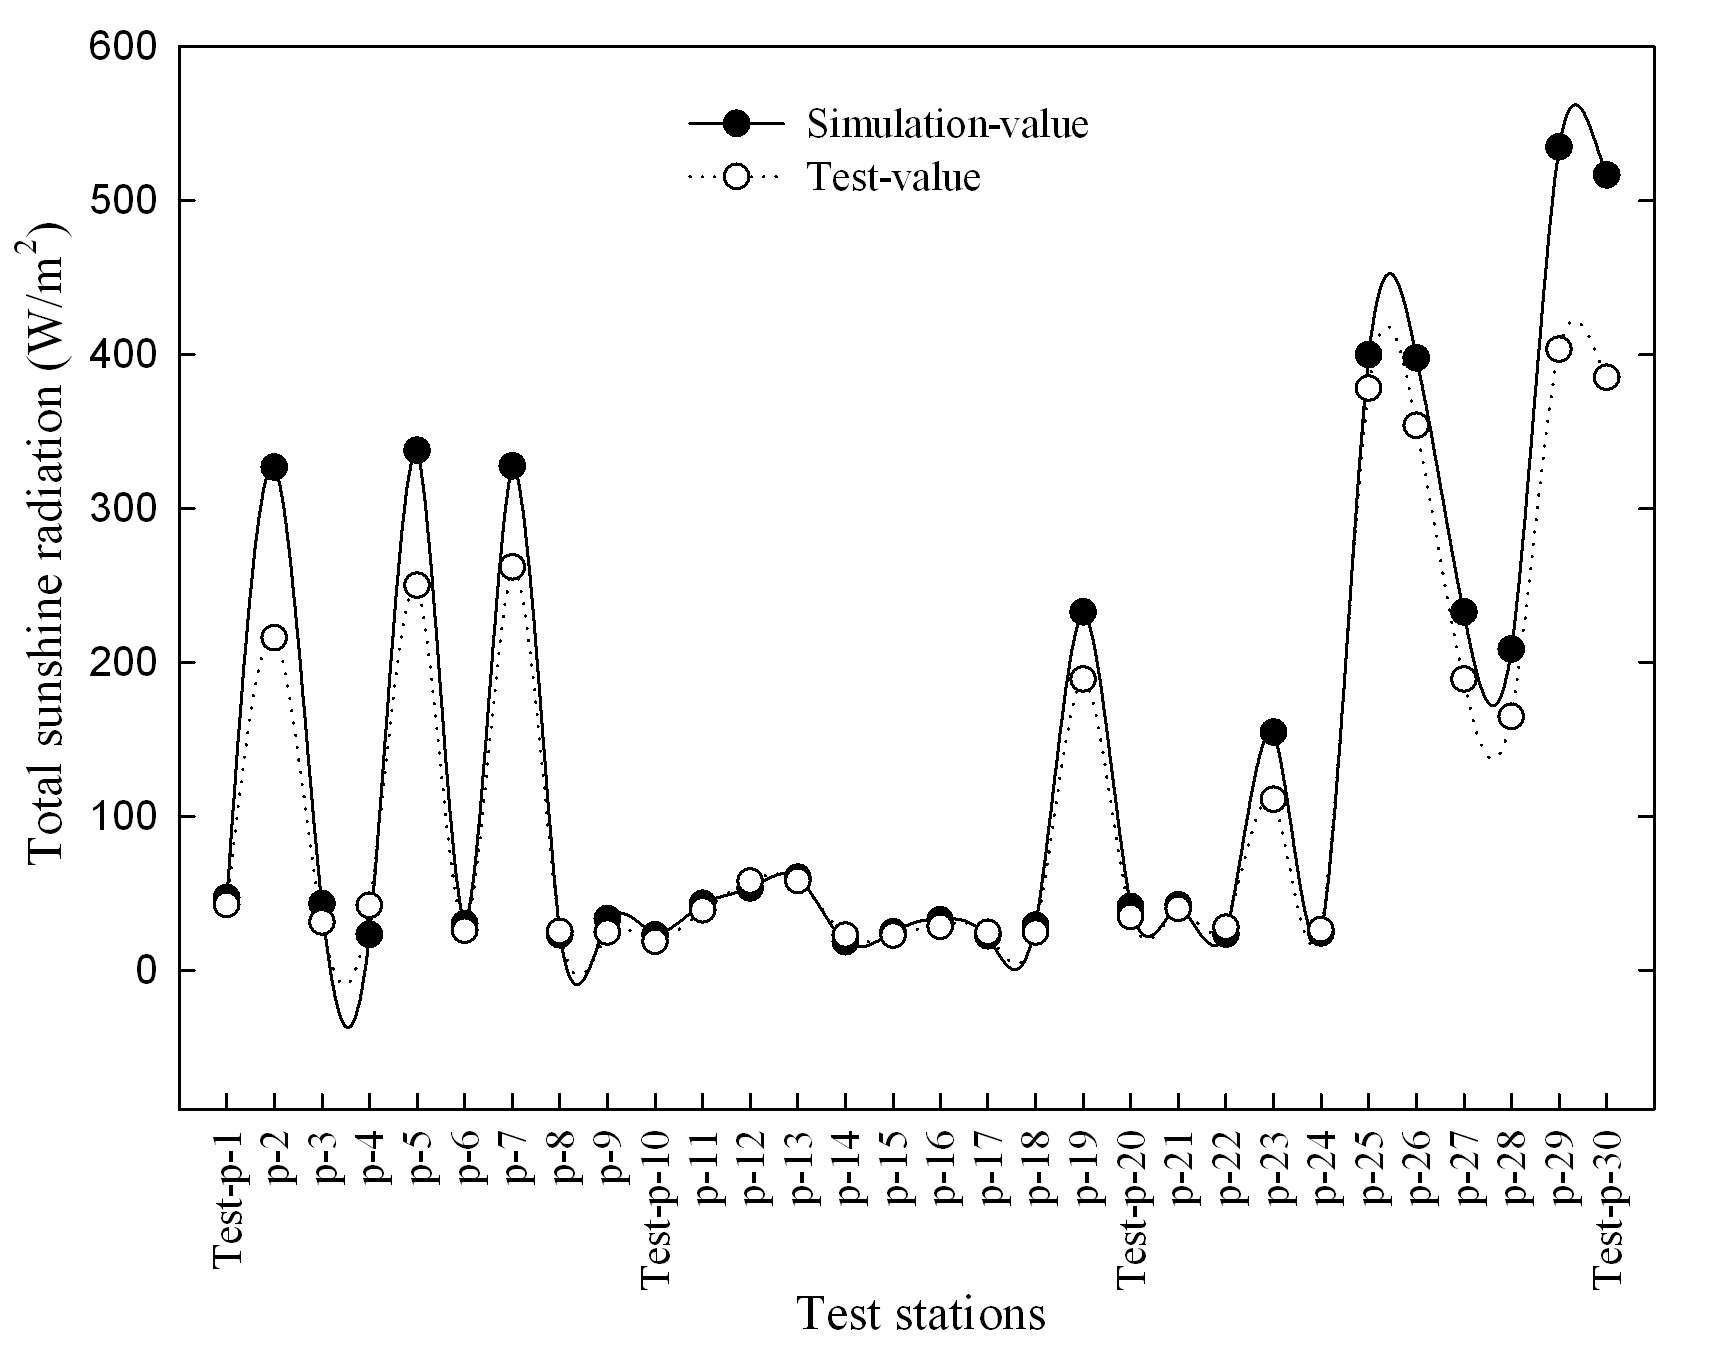


**Figure S2.** Comparison of total solar radiation between testing and modeling.
